# Supplementary material
Source: PubMed Central journal article supplement (PMC5560811)
Supplement: 2139TableS1.pdf [file 2139TableS1.pdf]

Table S1 Twenty-two non-redundant tissue categories in FlyAtlas (Chintapalli et al. 2007) used for this study.

---

Tissue categories

---

Adult Brain biological rep1  
Adult Eye biological rep1  
Adult Hind Gut biological rep1  
Adult Mid Gut biological rep1  
Adult Crop biological rep1  
Adult Salivary Gland rep1  
Adult Heart biological rep1  
Adult Thoracoabdominal ganglion rep1  
Adult Fatbody biological rep1  
Adult Carcass biological rep1  
Adult Testes biological rep1  
Adult Accessory gland biological rep1  
Adult Male Ejaculatory Duct biological rep1  
Adult Ovary biological rep1  
Larval Feeding Central Nervous System biological rep1  
Larval Feeding Hind Gut rep1  
Larval Feeding Mid Gut rep1  
Larval Feeding Salivary Gland rep1  
Larval Feeding Fatbody biological rep1  
Larval Feeding Carcass biological rep1  
Larval Feeding Malpighian Tubule biological rep1  
Larval Feeding Trachea biological rep1

---
